# Supplementary material for: Transition of yeast Can1 transporter to the inward-facing state unveils an α-arrestin target sequence promoting its ubiquitylation and endocytosis
Source: PubMed Central journal article supplement — Mol Biol Cell. 2017 Oct 15;28(21):2819–32. doi: 10.1091/mbc.E17-02-0104 (PMC5638585; doi:10.1091/mbc.e17-02-0104), 2017-10-15
Supplement: supp_E17-02-0104v1_CombinedSupMats.pdf [file supp_E17-02-0104v1_CombinedSupMats.pdf]

# Supplemental Materials

*Molecular Biology of the Cell*

Gournas et al.

## Supplementary material.

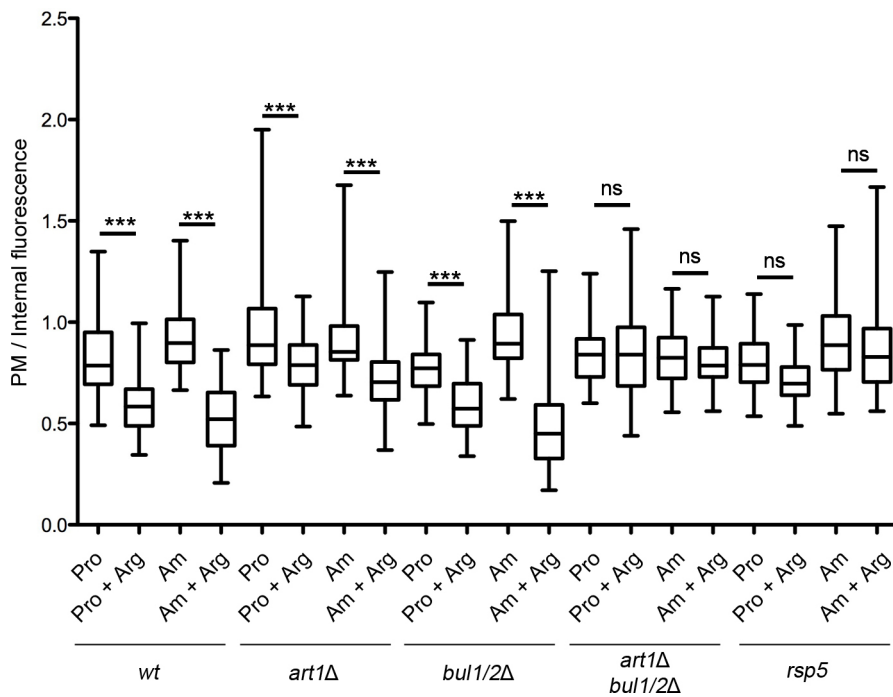

**Figure S1.** Related to Figure 1.

Quantification of the PM-to-intracellular GFP fluorescence intensity ratios (n, =90 cells) in cells of the Figure 1H experiment, performed as in Figure 1B.

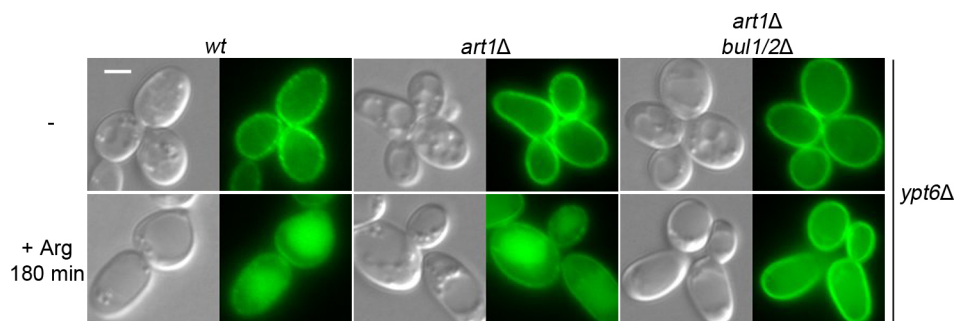

**Figure S2.** Related to Figure 2.

(A) Strains (all with *ypt6Δ gap1Δ can1Δ* mutations) expressing Can1-GFP from its endogenous promoter were grown in Glu Pro medium. Arg was added for 3 h before imaging by epifluorescence microscopy. The experiment shows that the involvement of Bul1/2 in Can1 downregulation illustrated in Figure 2 is not due to expression of Can1-GFP behind the strong *GAL* promoter.

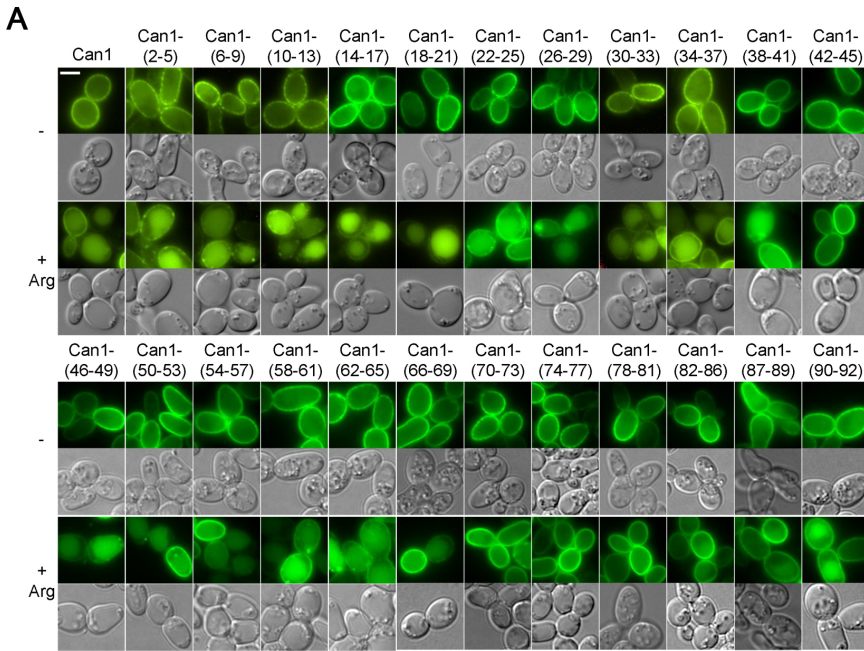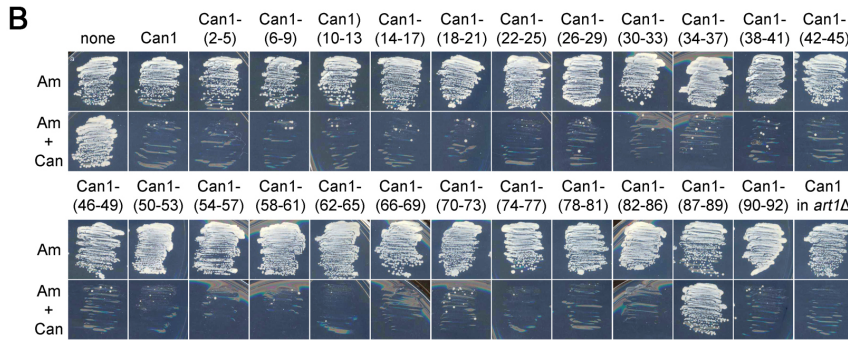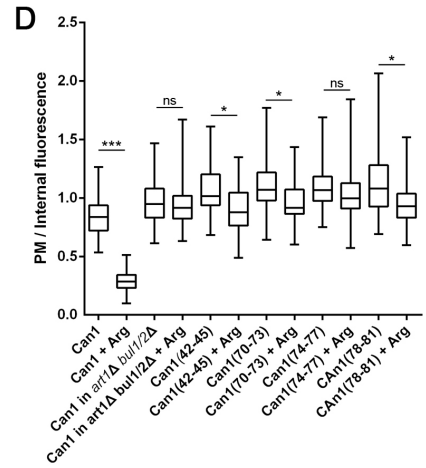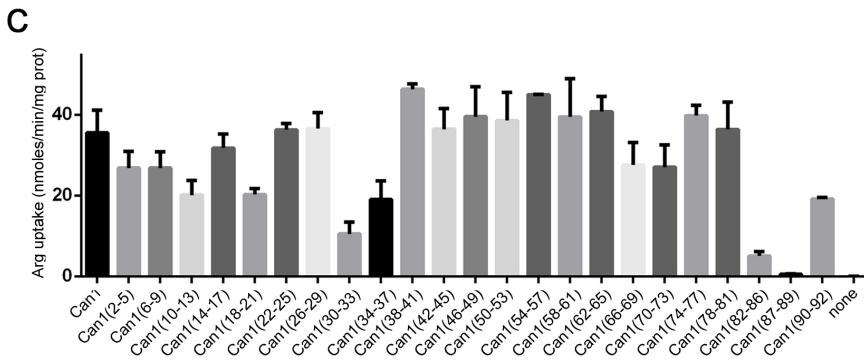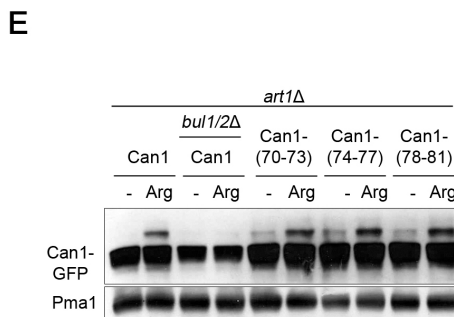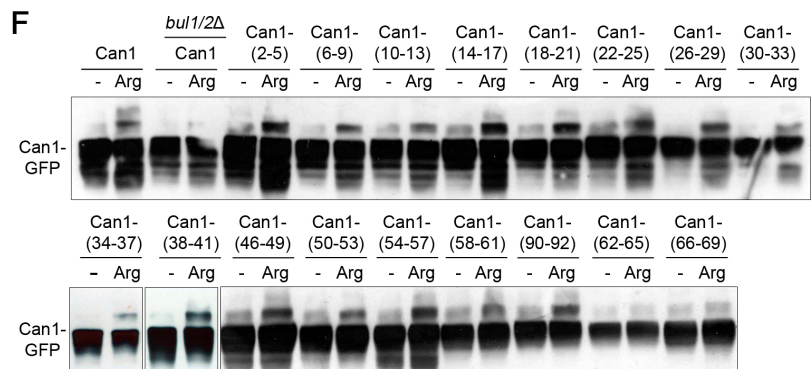

**Figure S3.** Mutational analysis of Can1's N-tail and impact on the permease localization, Arg-induced endocytosis, activity, and Bul-dependent ubiquitylation. Related to Figures 3 and 4.

(A) Cells of the *gap1Δ can1Δ* strain expressing Can1-GFP or the Can1-GFP mutants carrying Ala substitutions of the indicated residues were grown in Gal Pro. Glu was added for 1.5 h and then Arg for 3h, before analysis by epifluorescence microscopy.

(B) Cells used in A, and cells expressing none Can1-GFP (pURA3, empty vector), were grown for 3 days on solid Glu Am medium with or without canavanine.

(C) Initial uptake of <sup>14</sup>C-Arg was measured in cells used in A/B grown on Gal Pro medium.

(D). Quantifications of the microscopy images of Figure 3B, as in 1B. \*\*\*,  $P < 0.001$ ; \*,  $P < 0.05$ ; ns, nonsignificant,  $P > 0.05$ .

(F, G) Strains (all with *gap1Δ can1Δ* mutations) expressing Can1-GFP and the indicated Ala-substituted Can1-GFP mutants were grown on Gal Am medium. Glu was added for 0.5 h and then Arg for 15 min. Total protein extracts from culture samples were then probed with antibodies against GFP.

Comment regarding Figure S3. Can1-GFP mutants bearing Ala substitutions of 3-4 consecutive residues of the N-tail (residues 2-92) have been examined by epifluorescence microscopy (Figure S3A). All were properly targeted to the plasma membrane and most were targeted to the vacuole after Arg addition (Figure S3A). Five active mutants showed impaired Arg-induced vacuolar sorting. One of them is altered in the region 42-KDEK-45 further shown to contain the main Ub-acceptor Lys residues of Can1 (Figures 3C, D, E). The four others cluster in the region between residues 70 and 86 (Figures 3A, S3A). As resistance to Arg-induced endocytosis can be due to a loss of Arg transport activity (Ghaddar *et al.*, 2014b), we tested the functionality of the mutants by growth tests and direct measurement of <sup>14</sup>C-Arg uptake. For growth tests, sensitivity to canavanine, a toxic arginine analogue transported via Can1, was tested (Figure S3B). The results show that all Can1-GFP mutants are functional, except the one with Ala substitutions of the 87-ELK-89 residues. They also show that the mutants altered in the 70-81 region and resistant to Arg-induced endocytosis are competent for Arg transport. The uptake measurements (Figure S3C) also showed that the mutant bearing Ala substitutions of 82-EVQN-86 residues retained very low Arg uptake capacity, despite conferring sensitivity to canavanine (Figure S3B). This result is likely explainable by the very high toxicity of canavanine and illustrates that direct measurements of Can1 activities are needed for accurately determining the functionality of transporter mutants. Thus, the mutant in residues 82-EVQN-86 could be resistant to Arg-induced endocytosis either because it is part of the cluster of residues 70-81, or because of its low Arg transport. As this question remain open, we decided not to include it as part of the putative Art1-binding region (Figure 3A).

We also sought to identify the N-tail region of Can1 involved in Bul-dependent ubiquitylation. For this, we first tested whether the region required for Art1-mediated Can1 endocytosis is also required for the Bul1/2-dependent ubiquitylation. We thus expressed the corresponding mutants in an *art1Δ* strain and tested for Arg-induced ubiquitylation. Interestingly, the mutants altered in the 70-81 region were still ubiquitylated in *art1Δ* cells after Arg addition (Figure S3E) suggesting that the region necessary for the Bul1/2-dependent ubiquitylation of Can1 is different from the one for Art1. We therefore examined Arg-induced ubiquitylation of the remaining Ala-substituted Can1 mutants in an *art1Δ* strain (Figure S3F). Interestingly, two fully functional mutants bearing substitutions of residues 62-69 showed resistance to Bul1/2-dependent ubiquitylation. This region is thus proposed to correspond to the binding site of Bul1/2 (Figure 3A).



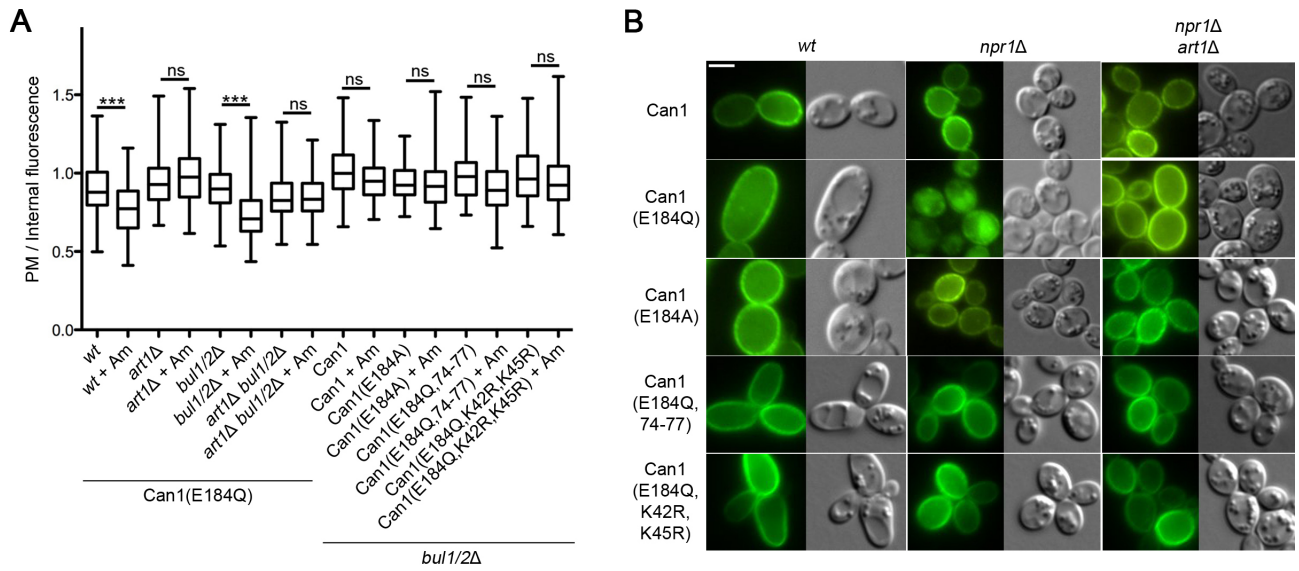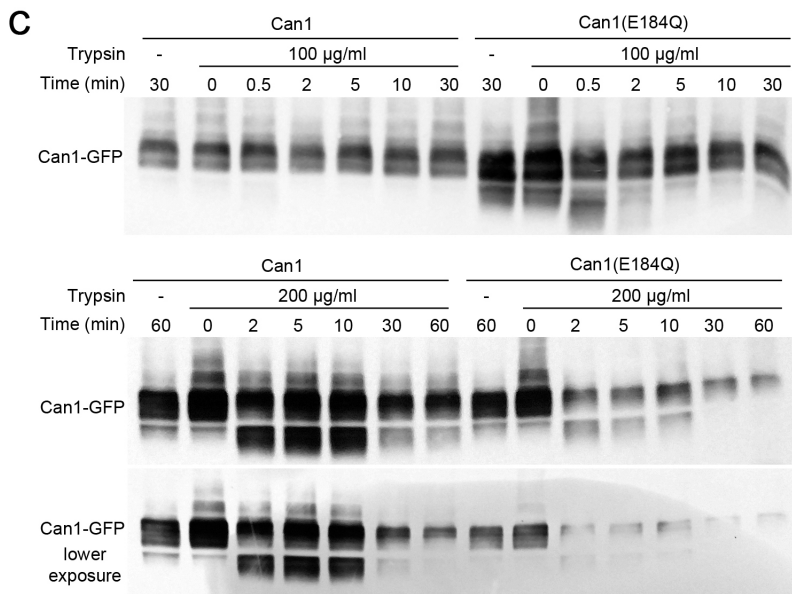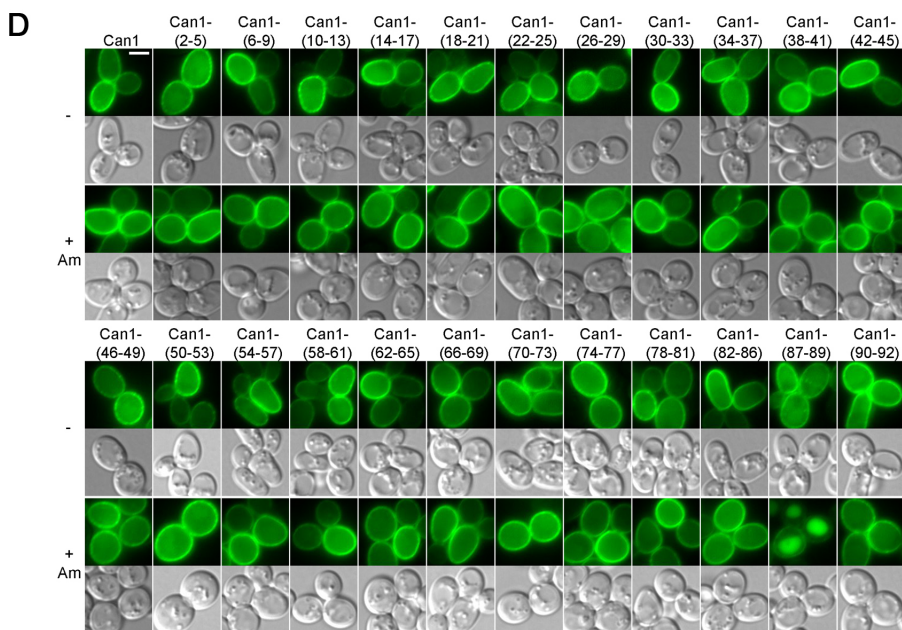

**Figure S4.** Analysis of Can1 mutants downregulated upon TORC1 activation. Related to Figure 6.

(A) Quantification of the fluorescence signals of Figure 6B, as in Figure 1B. The PM to intracellular GFP fluorescence intensity ratios are plotted (n, =90 cells).

(B) Epifluorescence microscopy analysis of Can1-GFP and the indicated Can1-GFP mutants in wild-type and mutant cells grown on Gal Pro medium. Glu was added for 1.5 h prior to observation.

(C) Immunoblot analysis of membrane enriched protein extracts from cells grown in Gal Pro medium and expressing either Can1-GFP or Can1(184Q)-GFP, incubated or not (-) with 100 (upper) or 200 (lower)  $\mu\text{g/ml}$  of trypsin for the indicated times. For the latter condition, two different exposures of the film are shown.

(D) Cells of the *gap1 $\Delta$  can1 $\Delta$*  strain expressing Can1-GFP or the indicated Ala-substituted N-tail Can1-GFP mutants were grown on Gal Pro medium. Glu was added for 1.5 h, and subsequently Am for 3 h, prior to observation by epifluorescence microscopy.

Comment regarding Fig. S4C. To determine whether Can1(E184Q) adopts a different conformation (see main text), we compared the sensitivity of Can1-GFP and Can1(E184Q)-GFP to limited trypsinolysis. Detergent-free membrane-enriched protein extracts were first isolated from Pro grown cells. In these cell extracts, membrane proteins including Can1 should remain embedded in membranes. A Can1 mutant adopting another conformation could differentially expose the N- and C-tails and/or the extra- and intracellular loops, resulting in altered sensitivity to trypsin. For instance, a similar approach revealed that a Gap1 permease newly synthesized under conditions of sphingolipid depletion is not only inactive but also misfolded (Lauwers et al., 2007). The result shows that Can1(E184Q), in two different experiments using different concentrations of trypsin and different incubation times, is more sensitive to trypsin compared to wt Can1 (Figure S4C). This suggests that the E184Q substitution favors a conformation that is different from the native protein.

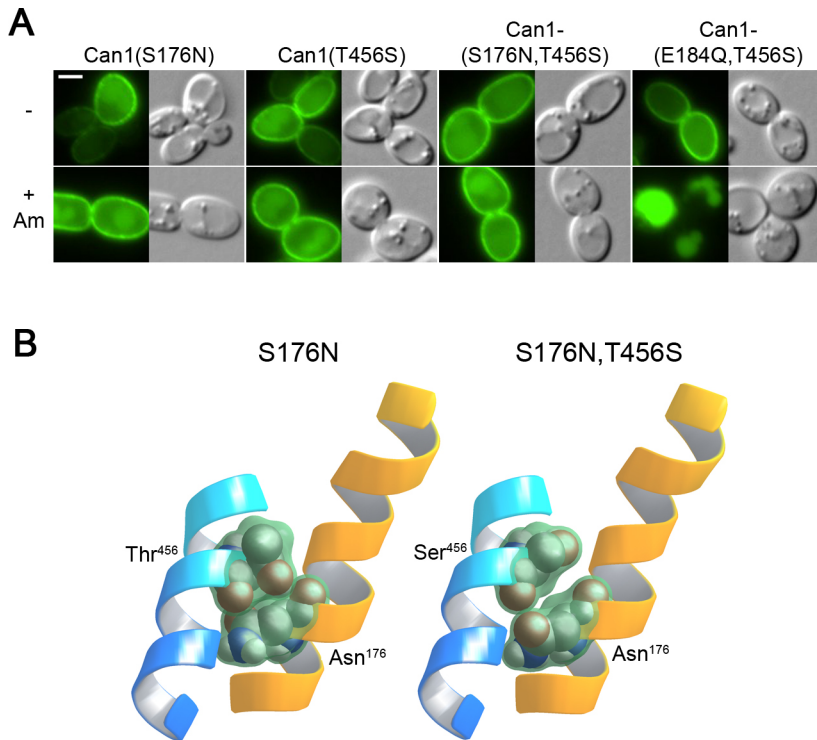

**Figure S5.** Related to Figure 7.

(A) Epifluorescence microscopy analysis of a *gap1Δ can1Δ bul1/2Δ* strain expressing Can1-GFP or the indicated Can1-GFP mutants, grown on Gal Pro. Glu was added for 1.5 h and then Am for 3 h.

(B) Representative close view of the region encompassing Asn176 in Can1(S176N,T456S) and in Can1(S176N) showing the structural proximity between the 176 and 456 residues. Residues at positions 176 and 456 are depicted as balls and by their molecule surface. Empty spaces are observed in most of the Can1(S176N/456S) 3D models in contrast to those of Can1(S176N).

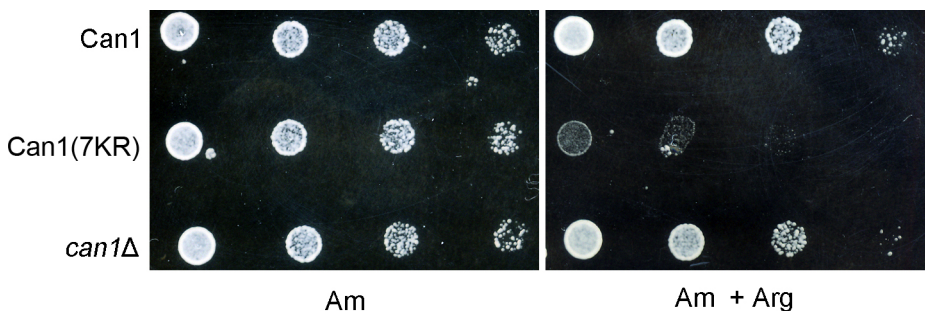

**Figure S6.** Deficiency in Can1 endocytosis causes Arg toxicity in yeast cells. Growth tests in Am or Am + Arg media of *gap1Δ can1Δ* strains containing plasmids expressing Can1-GFP, Can1(7KR)-GFP, or none Can1-GFP (*can1Δ*).

## Supplementary Tables

Table S1. *S. cerevisiae* strains used in this study

| Strain   | Genotype                                        | Reference or source             |
|----------|-------------------------------------------------|---------------------------------|
| 23344c   | <i>ura3</i>                                     | Laboratory collection           |
| EK008    | <i>gap1Δ ura3</i>                               | Laboratory collection           |
| 27038a   | <i>npi1-1(rsp5) ura3</i>                        | (Hein <i>et al.</i> , 1995)     |
| 35283a   | <i>can1Δ gap1Δ npi1-1(rsp5) ura3</i>            | This study                      |
| JA937    | <i>art1Δ gap1Δ ura3</i>                         | (Ghaddar <i>et al.</i> , 2014b) |
| JA939    | <i>art1Δ bul1Δ bul2Δ gap1Δ ura3</i>             | This study                      |
| JA493    | <i>bul1Δ bul2Δ gap1Δ ura3</i>                   | (Ghaddar <i>et al.</i> , 2014b) |
| ES029    | <i>can1Δ gap1Δ ura3</i>                         | This study                      |
| ES031    | <i>art1Δ can1Δ gap1Δ ura3</i>                   | This study                      |
| ES032    | <i>can1Δ ura3</i>                               | This study                      |
| CG010    | <i>can1Δ lyp1Δ gap1Δ ura3</i>                   | This study                      |
| CG052    | <i>art1Δ bul1Δ bul2Δ can1Δ gap1Δ ura3</i>       | This study                      |
| CG054    | <i>bul1Δ bul2Δ can1Δ gap1Δ ura3</i>             | This study                      |
| CG058    | <i>can1Δ gap1Δ ura3 leu2</i>                    | This study                      |
| CG059    | <i>art1Δ can1Δ gap1Δ ura3 leu2</i>              | This study                      |
| CG063    | <i>art1Δ bul1Δ bul2Δ can1Δ gap1Δ ura3 leu2</i>  | This study                      |
| CG064    | <i>ypt6Δ can1Δ gap1Δ ura3</i>                   | This study                      |
| CG074    | <i>art1Δ ypt6Δ can1Δ gap1Δ ura3</i>             | This study                      |
| CG076    | <i>ypt6Δ bul1Δ bul2Δ can1Δ gap1Δ ura3</i>       | This study                      |
| CG078    | <i>ypt6Δ art1Δ bul1Δ bul2Δ can1Δ gap1Δ ura3</i> | This study                      |
| JA482    | <i>npr1Δ ura3</i>                               | This study                      |
| JA410    | <i>bul1Δ bul2Δ npr1Δ ura3</i>                   | (Soetens <i>et al.</i> , 2001)  |
| CG022    | <i>art1Δ npr1Δ ura3</i>                         | This study                      |
| CG024    | <i>art1Δ bul1Δ bul2Δ npr1Δ ura3</i>             | This study                      |
| Mup1-GFP | <i>MUP1-GFP his3Δ leu2Δ met15Δ ura3Δ</i>        | Wedlich-Söldner laboratory      |
| MN041    | <i>ssy1Δ mup1Δ mup3Δ gap1Δ ura3</i>             | This study                      |



Table S2. Plasmids used in this study

| Plasmid | Description                                           | Reference or source             |
|---------|-------------------------------------------------------|---------------------------------|
| pFL038  | CEN-ARS (URA3)                                        | (Bonneaud <i>et al.</i> , 1991) |
| pJOD010 | CEN-ARS GAL1-GAP1-GFP (URA3)                          | (Nikko <i>et al.</i> , 2003)    |
| pCJ313  | CEN-ARS LEU2 HIS3 MET25                               | Lab collection                  |
| pAS103  | YEp-HA-NPR1 (URA3)                                    | (Schmidt <i>et al.</i> , 1998)  |
| pKG036  | CEN-ARS CAN1-GFP (URA3)                               | (Ghaddar <i>et al.</i> , 2014a) |
| pNAM001 | CEN-ARS LYP1-GFP (URA3)                               | (Ghaddar <i>et al.</i> , 2014a) |
| pCJ563  | CEN-ARS GAL1-CAN1-GFP (URA3)                          | (Ghaddar <i>et al.</i> , 2014a) |
| pCJ560  | CEN-ARS GAL1-CAN1(E184Q)-GFP (URA3)                   | This study                      |
| pCJ565  | CEN-ARS GAL1-CAN1(T180R)-GFP (URA3)                   | This study                      |
| pCJ569  | CEN-ARS GAL1-CAN1(T456S)-GFP (URA3)                   | This study                      |
| pCJ574  | CEN-ARS GAL1-CAN1(E184A)-GFP (URA3)                   | This study                      |
| pCG002  | CEN-ARS GAL1-CAN1(TNSK5-AAAA)-GFP (URA3)              | This study                      |
| pCG003  | CEN-ARS GAL1-CAN1((IEEK13-AAAA)-GFP (URA3)            | This study                      |
| pCG004  | CEN-ARS GAL1-CAN1((EDAD9-AAAA)-GFP (URA3)             | This study                      |
| pCG005  | CEN-ARS GAL1-CAN1((HMYN17-AAAA)-GFP (URA3)            | This study                      |
| pCG006  | CEN-ARS GAL1-CAN1((EPVT21-AAAA)-GFP (URA3)            | This study                      |
| pCG008  | CEN-ARS GAL1-CAN1((SQTH33-AAAA)-GFP (URA3)            | This study                      |
| pCG010  | CEN-ARS GAL1-CAN1((HRRG37-AAAA)-GFP (URA3)            | This study                      |
| pCG011  | CEN-ARS GAL1-CAN1(TLFH25-AAAA)-GFP (URA3)             | This study                      |
| pCG012  | CEN-ARS GAL1-CAN1(DVE28-AAAA)-GFP (URA3)              | This study                      |
| pCG014  | CEN-ARS GAL1-CAN1(SIPL41-AAAA)-GFP (URA3)             | This study                      |
| pCG015  | CEN-ARS GAL1-CAN1(SKEL49-AAAA)-GFP (URA3)             | This study                      |
| pCG016  | CEN-ARS GAL1-CAN1(YPLR53-AAAA)-GFP (URA3)             | This study                      |
| pCG017  | CEN-ARS GAL1-CAN1(SFPT57-AAAA)-GFP (URA3)             | This study                      |
| pCG018  | CEN-ARS GAL1-CAN1(RVNG61-AAAA)-GFP (URA3)             | This study                      |
| pCG019  | CEN-ARS GAL1-CAN1(KDEK45-AAAA)-GFP (URA3)             | This study                      |
| pCG020  | CEN-ARS GAL1-CAN1(EDTF65-AAAA)-GFP (URA3)             | This study                      |
| pCG022  | CEN-ARS GAL1-CAN1(EDEG77-AAAA)-GFP (URA3)             | This study                      |
| pCG024  | CEN-ARS GAL1-CAN1(EVQN81-AAAA)-GFP (URA3)             | This study                      |
| pCG025  | CEN-ARS GAL1-CAN1(ELK89-AAAA)-GFP (URA3)              | This study                      |
| pCG026  | CEN-ARS GAL1-CAN1(QRH92-AAAA)-GFP (URA3)              | This study                      |
| pCG028  | CEN-ARS GAL1-CAN1((S176N-E184Q-T456S)-GFP (URA3)      | This study                      |
| pCG029  | CEN-ARS GAL1-CAN1(E184Q-T456S)-GFP (URA3)             | This study                      |
| pCG030  | CEN-ARS GAL1-CAN1(S176N-T456S)-GFP (URA3)             | This study                      |
| pCG031  | CEN-ARS GAL1-CAN1(S176N-E184Q)-GFP (URA3)             | This study                      |
| pCG032  | CEN-ARS GAL1-CAN1(S176N)-GFP (URA3)                   | This study                      |
| pCG033  | CEN-ARS GAL1-CAN1(SMED69-AAAA)-GFP (URA3)             | This study                      |
| pCG035  | CEN-ARS GAL1-CAN1(GIGD73-AAAA)-GFP (URA3)             | This study                      |
| pCG037  | CEN-ARS GAL1-CAN1(EVKR86-AAAA)-GFP (URA3)             | This study                      |
| pCG054  | CEN-ARS GAL1-CAN1(K42R/K45R)-GFP (URA3)               | This study                      |
| pCG056  | CEN-ARS GAL1-CAN1(K42R)-GFP (URA3)                    | This study                      |
| pCG058  | CEN-ARS GAL1-CAN1(K45R)-GFP (URA3)                    | This study                      |
| pCG064  | CEN-ARS GAL1-CAN1((EDEG77-AAAA/E184Q)-GFP (URA3)      | This study                      |
| pCG065  | CEN-ARS GAL1-CAN1(T180R/E184Q)-GFP (URA3)             | This study                      |
| pCG069  | CEN-ARS GAL1-CAN1(SMED69-AAAA/EDEG77-AAAA)-GFP (URA3) | This study                      |
| pCG077  | CEN-ARS GAL1-CAN1(K42R/K45R/E184Q)-GFP (URA3)         | This study                      |

|         |                                                                     |                                 |
|---------|---------------------------------------------------------------------|---------------------------------|
| pCG080  | CEN-ARS GAL1-CAN1(K5R/K13R/K42R/K45R/K47R/K85R/K89R)-GFP (URA3)     | This study                      |
| pCG108  | CEN-ARS GAL1-CAN1(K5R/K13R/K42R/K45R/K47R/K85R/K89R)-mCherry (LEU2) | This study                      |
| pBOA010 | CEN-ARS Sec7-mCherry (LEU2)                                         | (Llinares <i>et al.</i> , 2015) |

## Supplementary References

Bonneaud, N., Ozier-Kalogeropoulos, O., Li, G. Y., Labouesse, M., Minvielle-Sebastia, L., and Lacroute, F. (1991). A family of low and high copy replicative, integrative and single-stranded *S. cerevisiae/E. coli* shuttle vectors. *Yeast* 7, 609–615.

Ghaddar, K., Krammer, E.-M., Mihajlovic, N., Brohée, S., André, B., and Prévost, M. (2014a). Converting the yeast arginine Can1 permease to a lysine permease. *J. Biol. Chem.* 289, 7232–7246.

Ghaddar, K., Merhi, A., Saliba, E., Krammer, E.-M., Prévost, M., and André, B. (2014b). Substrate-induced ubiquitylation and endocytosis of yeast amino Acid permeases. *Mol. Cell. Biol.* 34, 4447–4463.

Hein, C., Springael, J. Y., Volland, C., Haguenaer-Tsapis, R., and André, B. (1995). *NP11*, an essential yeast gene involved in induced degradation of Gap1 and Fur4 permeases, encodes the Rsp5 ubiquitin-protein ligase. *Mol. Microbiol.* 18, 77–87.

Hochstrasser, M., Ellison, M. J., Chau, V., and Varshavsky, A. (1991). The short-lived MAT alpha 2 transcriptional regulator is ubiquitinated in vivo. *Proc. Natl. Acad. Sci. U.S.a.* 88, 4606–4610.

Lauwers, E., Grossmann, G., and André, B. (2007). Evidence for coupled biogenesis of yeast Gap1 permease and sphingolipids: essential role in transport activity and normal control by ubiquitination. *Mol. Biol. Cell* 18, 3068–3080.

Llinares, E., Barry, A. O., and André, B. (2015). The AP-3 adaptor complex mediates sorting of yeast and mammalian PQ-loop-family basic amino acid transporters to the vacuolar/lysosomal membrane. *Sci Rep* 5, 16665.

Nikko, E., and André, B. (2007). Evidence for a direct role of the Doa4 deubiquitinating enzyme in protein sorting into the MVB pathway. *Traffic* 8, 566–581.

Nikko, E., Marini, A. M., and André, B. (2003). Permease recycling and ubiquitination status reveal a particular role for Bro1 in the multivesicular body pathway. *J. Biol. Chem.* 278, 50732–50743.

Schmidt, A., Beck, T., Koller, A., Kunz, J., and Hall, M. N. (1998). The TOR nutrient signalling pathway phosphorylates NPR1 and inhibits turnover of the tryptophan permease. *Embo J.* 17, 6924–6931.

Soetens, O., De Craene, J. O., and André, B. (2001). Ubiquitin is required for sorting to the vacuole of the yeast general amino acid permease, Gap1. *J. Biol. Chem.* 276, 43949–43957.
